# Supplementary material
Source: PubMed Central journal article supplement (PMC3445978)
Supplement: EC.00149-12_zek999093954so2.pdf [file EC.00149-12_zek999093954so2.pdf]

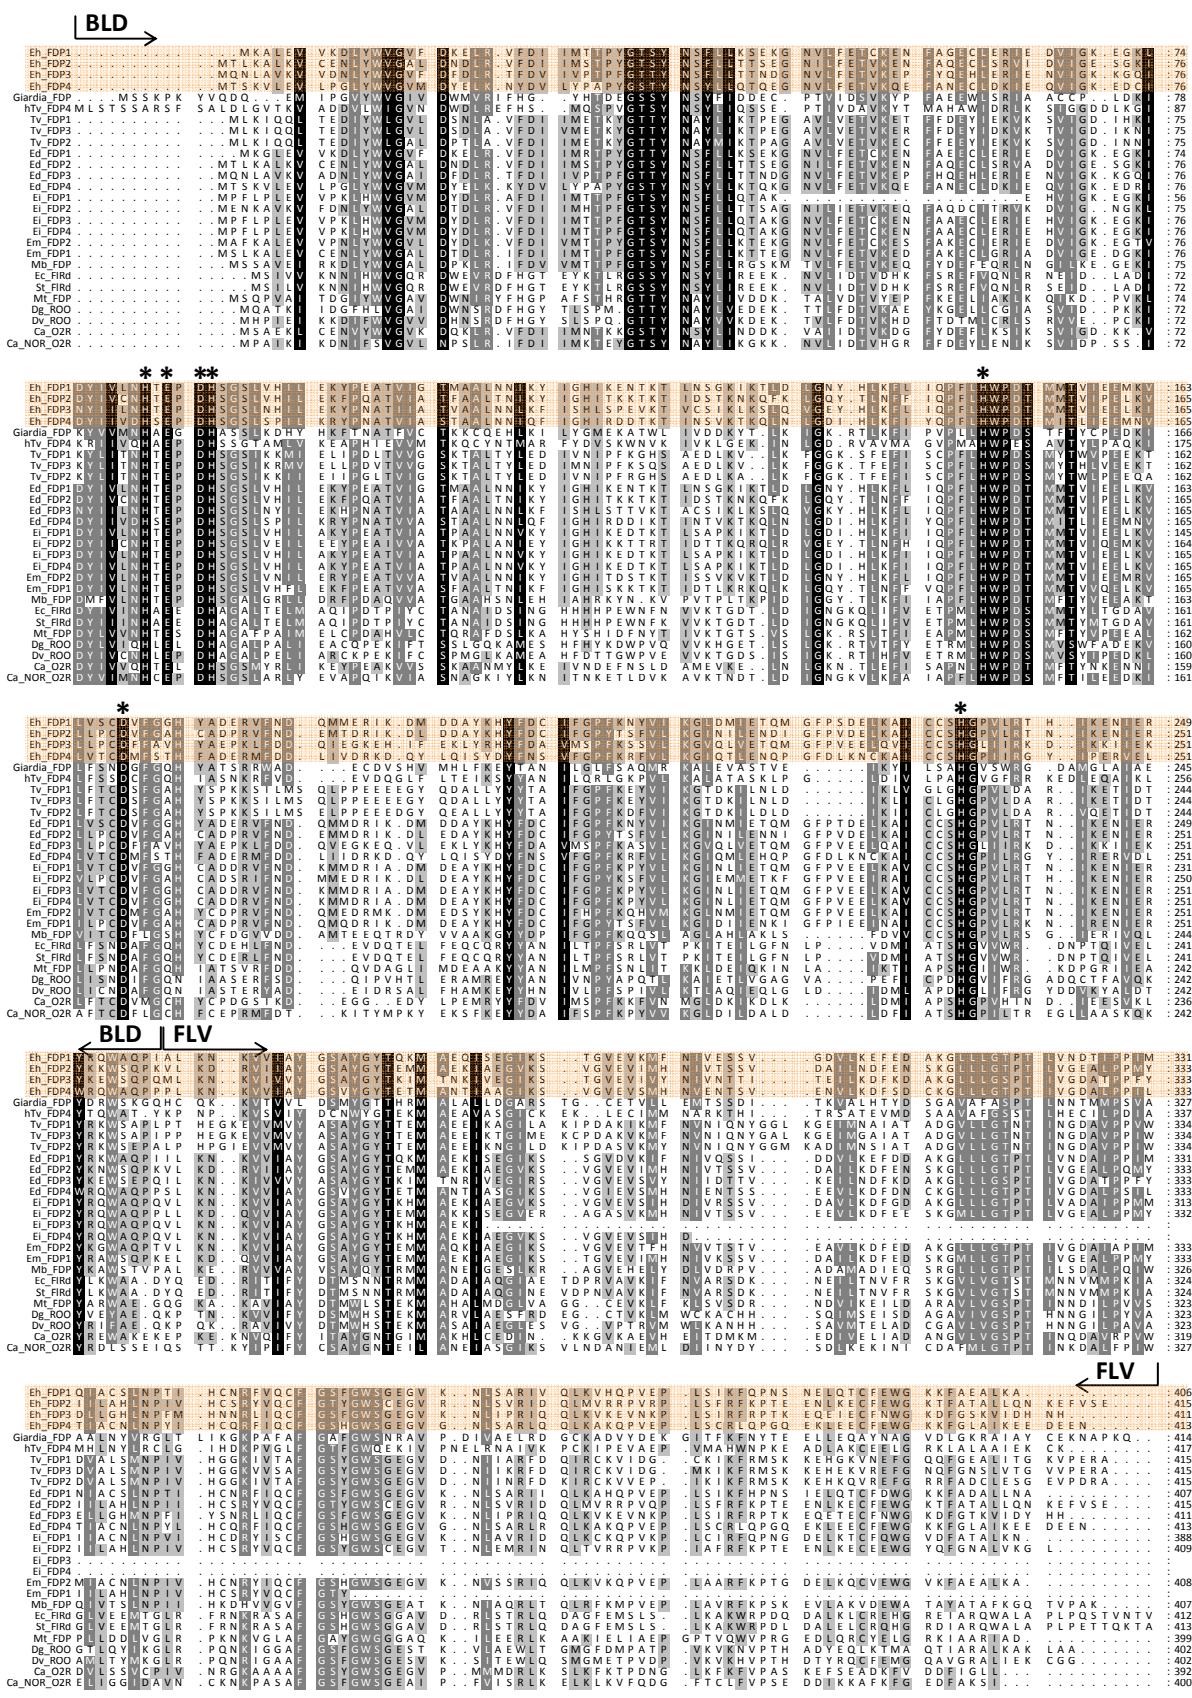

**Supplementary Figure 1: Aminoacid sequence alignment between *Entamoeba histolytica* flavodiiron proteins and other protozoan FDPs, as well as prokaryotic models.** Sequence alignment obtained with Clustal X. Eh\_FDP1, EhFDP2, Eh\_FDP3 and EhFDP4, the four *Entamoeba histolytica* flavodiiron proteins (XP\_656946, XP\_654023, XP\_651815, XP\_651627); Giardia\_FDP – *Giardia intestinalis* flavodiiron protein (XP\_001707670); hTv\_FDP4, *Trichomonas vaginalis* hydrogenosomal flavodiiron protein (XP\_001583562); Tv\_FDP1, Tv\_FDP2 and Tv\_FDP3, *Trichomonas vaginalis* flavodiiron proteins (XP\_001315422, XP\_001317833, XP\_001322980); Ed\_FDP1, Ed\_FDP2, Ed\_FDP3 and Ed\_FDP4, *Entamoeba dispar* flavodiiron proteins (XP\_001736248, XP\_001740812, XP\_001738262, XP\_001735719); Ei\_FDP1, Ei\_FDP2, Ei\_FDP3 and Ei\_FDP4, *Entamoeba invadens* flavodiiron proteins (EIN\_289520+, EIN\_295740+, EIN\_311980+, EIN\_312270+); Em\_FDP1 and Eh\_FDP2, *Entamoeba moshkovskii* flavodiiron proteins (CAI11386, CAI11385); Mb\_FDP, *Mastigamoeba balamuthi* flavodiiron protein (Q2PCA4); Ec\_FIRd, *Escherichia coli* flavorubredoxin (NP\_417190); St\_FIRd, *Salmonella typhimurium* flavorubredoxin (NP\_461761); Mt\_FDP, *Moorella thermoacetica* flavodiiron protein (Q9FDN7); Dg\_ROO, *Desulfovibrio gigas* rubredoxin:oxygen oxidoreductase (Q9F0J6); Dv\_ROO, *Desulfovibrio vulgaris* rubredoxin:oxygen oxidoreductase (YP\_012395); Ca\_O2R, *Clostridium acetobutylicum* O2-reducing flavodiiron protein (AAK79003); Ca\_NOR\_O2R, *Clostridium acetobutylicum* NO- and O2-reducing flavodiiron protein (NP\_349063). +, gene accession number from amoebaDB website (<http://amoebadb.org/amoeba/>). \*, ligands for the diiron active site; BLD,  $\beta$ -lactamase-like domain; FLV, flavodoxin-like domain. The *E. histolytica* FDP sequences are highlighted.

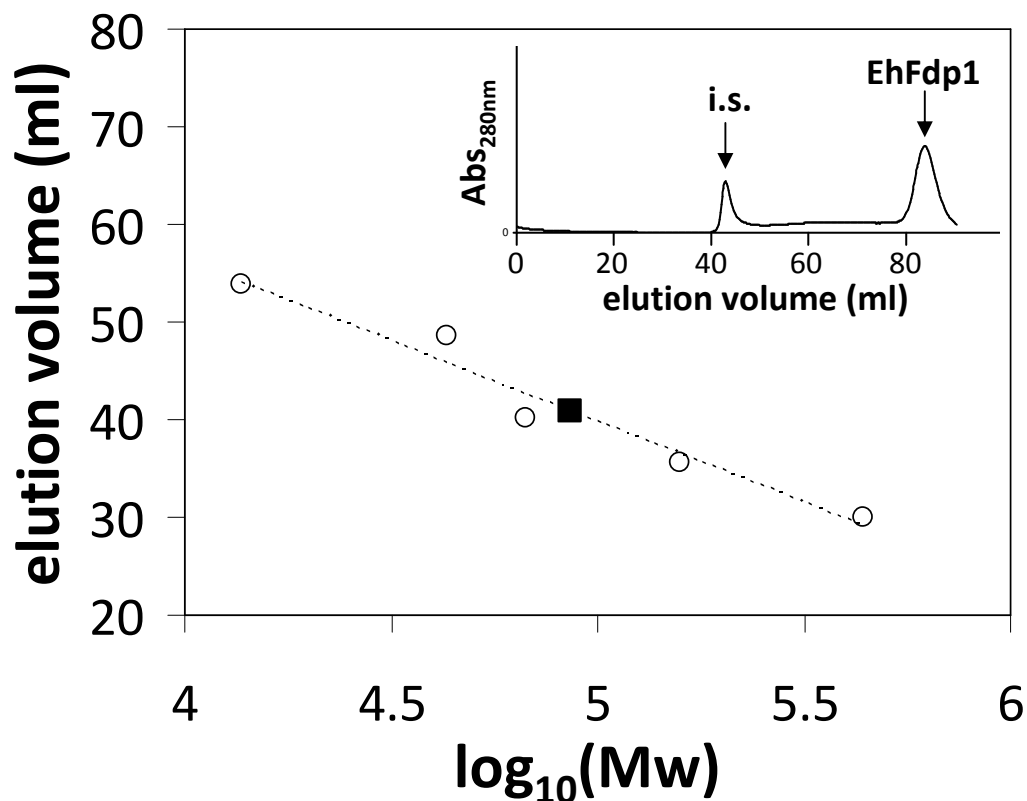

**Supplementary Figure 2: *Entamoeba histolytica* flavodiiron protein EhFdp1 is homodimeric.** Oligomeric profile of EhFdp1 determined by size exclusion chromatography. Standards and sample loaded (separately) onto a 120-ml Superdex S-200 (GE Healthcare) connected to an Äkta Prime FPLC System, previously equilibrated and ran at 0.5 ml/min with 20 mM Tris-HCl buffer, 18% glycerol, 150 mM NaCl, pH 7.5. Internal standard (i.s.): dextran blue (Mw 1000 kDa); molecular mass standards: ribonuclease (13.7 kDa), ovalbumin (44 kDa), albumin (67 kDa), aldolase (158 kDa) and ferritin (440 kDa). Calibration curve obtained by linear regression of elution volume vs log<sub>10</sub>(standard molecular mass). Hollow circles, molecular mass standards; black square, EhFdp1. Inset, chromatogram obtained for EhFdp1.

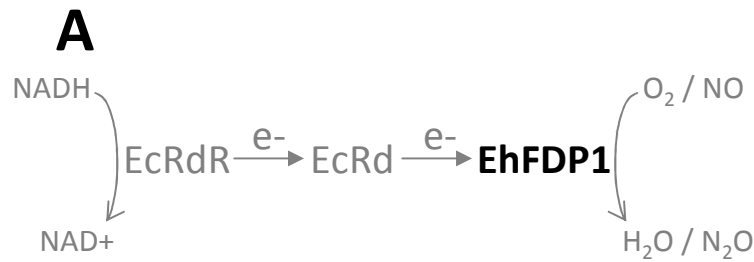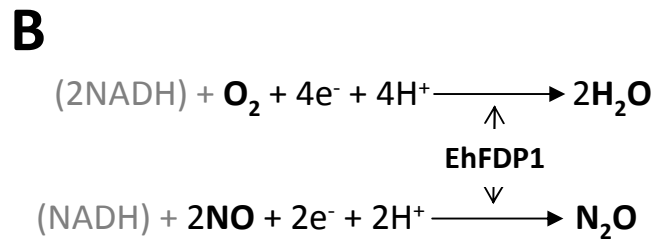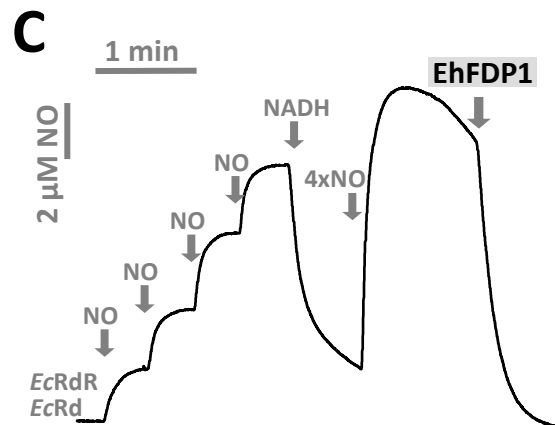

**Supplementary Figure 3: *Entamoeba histolytica* flavodiiron protein EhFdp1 has low nitric oxide reductase activity.** Amperometric measurement using a Clark-type nitric oxide electrode. **(A)** Electron delivery to EhFDP1 achieved by assembling a hybrid electron transfer chain composed by NADH, *Escherichia coli* NADH:(flavo)rubredoxin oxidoreductase (EcRdR) and *Escherichia coli* flavorubredoxin rubredoxin domain (EcRd). **(B)** Reaction stoichiometries for oxygen reduction to water or nitric oxide reduction to nitrous oxide, at the expense of NADH oxidation. **(C)** Amperometric assay for nitric oxide reduction by EhFdp1 in anaerobiosis. Reaction mixture volume 1 ml; measurements done at room temperature, in 50 mM Tris-HCl, 18% glycerol, pH 7.5. Anaerobic conditions achieved by thorough degassing of reaction buffer with argon, and by adding glucose oxidase (4 U/ml), glucose (2 mM) and catalase (130 U/ml) to the assay. Sequential addition of 2  $\mu\text{M}$  EcRdR, 4  $\mu\text{M}$  EcRd, 4x 2  $\mu\text{M}$  NO, 1 mM NADH, 8  $\mu\text{M}$  NO, and 320 nM EhFdp1. Nitric oxide depletion upon addition of sub-stoichiometric EhFdp1 proceeds through non-linear kinetics.

**Supplementary Table 1** – Annotation of flavodiiron protein-encoding genes in *Entamoeba histolytica* genome.

| <i>Flavodiiron protein abbreviation</i> | <i>.m annotation</i>  | <i>EHI annotation</i>    |
|-----------------------------------------|-----------------------|--------------------------|
| EhFdp1                                  | 6.m00467 <sup>a</sup> | EHI_096710<br>EHI_152650 |
| EhFdp2                                  | 155.m00084            | EHI_159860               |
| EhFdp3                                  | 146.m00121            | EHI_129890               |
| EhFdp4                                  | 65.m00171             | EHI_064530               |

a - the gene identified as 6.m00467 has two identical equivalents in the most recent annotation, which are both herein represented by EhFdp1.

**Supplementary Table 2** – Redox mediators used to obtain the binuclear diiron site in a mixed-valence state, monitored by electron paramagnetic resonance (EPR) spectroscopy.

| <i>Redox mediator<sup>a</sup></i>  | <i>E<sup>o</sup> (mV, vs. SHE)</i> |
|------------------------------------|------------------------------------|
| 1,2-napthoquinone-4-sulphonic acid | +215                               |
| 1,2-napthoquinone                  | +180                               |
| trimethylhydroquinone              | +115                               |
| 1,4-napthoquinone                  | +60                                |
| menadione                          | 0                                  |
| plumbagin                          | -40                                |
| indigo trisulphonate               | -70                                |
| indigo disulphonate                | -110                               |
| 2-hydroxy-1,4-napthoquinone        | -152                               |
| anthraquinone-2-sulphonate         | -225                               |

a - redox mediators (40 μM each) were incubated for 30 minutes with 190 μM EhFdp1 under anaerobic conditions prior to addition of sodium dithionite.
